# Supplementary material for: A Meta-Analysis of Sampled Maximal Aerobic Capacity Data for Boys Aged 11 Years Old or Less Obtained by Cycle Ergometry
Source: MDPI journal article supplement (doi:10.3390/life13020276), 2023-01-19
Supplement: s1 [file s1]

## Supplementary S2

Table S2: Included Studies for Relative  $\text{VO}_{2\text{max/peak}}$  values ( $\text{Lmin}^{-1}$ )

| Age  |     | Age    | Body Mass |      | Height |      | BMI                  |                      | VO <sub>2max</sub>                     |                                        | COV   | Additional<br>Comments | Peak (P) or max<br>(M) VO <sub>2</sub>                | Location | Reference |                                                     |
|------|-----|--------|-----------|------|--------|------|----------------------|----------------------|----------------------------------------|----------------------------------------|-------|------------------------|-------------------------------------------------------|----------|-----------|-----------------------------------------------------|
| Mean | SD  |        | Mean      | SD   | Mean   | SD   | Mean                 | SD                   | Mean                                   | SD                                     |       |                        |                                                       |          |           |                                                     |
| (y)  | (y) |        | (kg)      | (kg) | (cm)   | (cm) | (kg/m <sup>2</sup> ) | (kg/m <sup>2</sup> ) | (Lkg <sup>-1</sup> min <sup>-1</sup> ) | (Lkg <sup>-1</sup> min <sup>-1</sup> ) | ( % ) | n                      |                                                       |          |           |                                                     |
| 7.4  | 0.6 | 6-10   | 29.9      | 5.3  | 130    | 11.1 | NP                   | NP                   | 41.7                                   | 3.3                                    | 7.9   | 6                      | Individual data: of<br>VO <sub>2max</sub> : 34.2-51.0 | M        | USA       | Springer et al. (1991) (1)                          |
| 7.5  | 0.8 | 7-12   | 24.0      | 2.3  | 126    | 6    | NP                   | NP                   | 47.0                                   | 6.0                                    | 12.8  | 22                     | BSA<1.0 m <sup>3</sup>                                | M        | USA       | Washington et al. (1988) (2)                        |
| 8    | NP  | 8      | 32.7      | 6.6  | 133    | 5.0  | 18.3                 | 2.8                  | 45.1                                   | 11.8                                   | 26.2  | NP                     | African-American                                      | M        | USA       | McMurray et al. (2001) (3)                          |
| 8    | NP  | 8      | 30.7      | 6.0  | 132    | 6.0  | 17.5                 | 2.6                  | 46.5                                   | 8.9                                    | 19.1  | NP                     | Caucasian                                             | M        | USA       | McMurray et al. (2001) (3)                          |
| 8.4  | 1.3 | NP     | 27.5      | 4.7  | 125    | 9.4  | NP                   | NP                   | 14.4                                   | 5.4                                    | 37.5  | 13                     | Have Duchenne<br>muscular dystrophy                   | P        | USA       | Sockolov et al. (1977) (4)                          |
| 8.4  | 1.3 | NP     | 27.0      | 4.7  | 128    | 6.6  | NP                   | NP                   | 40.0                                   | 3.9                                    | 9.8   | 13                     | Normal, untrained<br>sample                           | P        | USA       | Sockolov et al. (1977) (4)                          |
| 8.6  | 2.0 | NP     | 27.6      | 6.9  | 132    | 11.3 | NP                   | NP                   | 40.2                                   | 5.9                                    | 14.7  | 6                      | VO <sub>2max</sub> plateau group                      | M        | PR        | Rivera-Brown et al. (2001) (5)                      |
| 8.9  | 0.6 | 7-9    | 30.4      | 5.2  | 132    | 4.7  | 17.4                 | 2.4                  | 49.1                                   | 6.4                                    | 13.0  | 23                     | Treadmill v. cycle<br>study                           | M        | USA       | Turley et al.(1995) <i>Pediatr Exer Sci</i> 7:49-60 |
| 9    | NP  | 9      | 37.0      | 10.0 | 139    | 7.0  | 19.0                 | 3.7                  | 43.9                                   | 10.6                                   | 24.1  | NP                     | African-American                                      | M        | USA       | McMurray et al. (2001) (3)                          |
| 9    | NP  | 9      | 35.0      | 8.6  | 137    | 6.0  | 18.5                 | 3.5                  | 45.2                                   | 9.9                                    | 21.9  | NP                     | Caucasian                                             | M        | USA       | McMurray et al. (2001) (3)                          |
| 9.1  | 0.7 | 7-9    | 29.5      | 4.3  | 134    | 6.3  | 16.2                 | 1.5                  | 50.7                                   | 4.6                                    | 9.1   | 12                     | Cycle ergometer v.<br>treadmill study                 | M        | USA       | Turley & Wilmore (1997) (6)                         |
| 9.3  | 1.5 | 7-12.0 | 32.0      | 3.0  | 139    | 7    | NP                   | NP                   | 46.0                                   | 5.0                                    | 10.9  | 30                     | BSA: 1.0-1.19 m <sup>3</sup>                          | M        | USA       | Washington et al. (1988) (2)                        |
| 9.3  | 1.3 | NP     | 36.1      | 9.1  | 136    | 8.9  | NP                   | NP                   | 39.8                                   | 7.3                                    | 18.3  | 12                     | No VO <sub>2max</sub> plateau                         | M        | PR        | Rivera-Brown et al. (2001) (5)                      |
| 9.4  | 1.7 | 7-12   | 33.2      | 7.3  | 139    | 10.3 | NP                   | NP                   | 42.7                                   | 5.5                                    | 12.9  | 32                     |                                                       | P        | USA       | Gilliam et al. (1977) (7)                           |
| 9.5  | 0.7 | NP     | 33.3      | 4.5  | 141    | 6.4  | NP                   | NP                   | 40.8                                   | 10.9                                   | 26.7  | 16                     | Evaluation of two<br>exertion scales                  | P        | USA       | Barkley et al. (2008) (8)                           |

|      |     |          |      |      |     |      |      |     |      |      |      |     |                                                  |   |     |                                |
|------|-----|----------|------|------|-----|------|------|-----|------|------|------|-----|--------------------------------------------------|---|-----|--------------------------------|
| 9.8  | 0.6 | 8.2-11.0 | 34.3 | 7.8  | 140 | 5.5  | 17.5 | 3.7 | 35.4 | 7.5  | 21.2 | 20  | VO <sub>2max</sub> 20.7-47.3<br>A priori average | M | USA | Swain et al. (2010) (9)        |
| 9.8  | 1.6 | 8-12     | 38.0 | 2.1  | 143 | 7.6  | NP   | NP  | 45.0 | 2.6  | 5.8  | 12  | VO <sub>2max</sub>                               | P | USA | Robertson et al. (2001) (10)   |
| 10   | NP  | 10       | 39.3 | 9.0  | 142 | 7.0  | 19.3 | 3.2 | 44.3 | 9.2  | 20.8 | NP  | African-American                                 | M | USA | McMurray et al. (2001) (3)     |
| 10   | NP  | 10       | 38.2 | 9.6  | 141 | 7.0  | 19.0 | 3.8 | 44.8 | 9.8  | 21.9 | NP  | Caucasian<br>A priori above average              | M | USA | McMurray et al. (2001) (3)     |
| 10.0 | 1.7 | 8-12     | 37.3 | 1.7  | 143 | 9.9  | NP   | NP  | 54.5 | 2.3  | 4.2  | 12  | VO <sub>2max</sub>                               | P | USA | Robertson et al. (2001) (10)   |
| 10.0 | 2.0 | 6-13     | 34.0 | 9.0  | 138 | 14.0 | NP   | NP  | 42.0 | 6.0  | 14.3 | 37  |                                                  | M | USA | Cooper et al. (1984) (11)      |
| 10.3 | 1.0 | NP       | 36.1 | 8.0  | 141 | 8.0  | 18.1 | 2.0 | 38.4 | 5.0  | 13.0 | 19  | Lean subjects                                    | P | USA | Rivas et al. (2019) (12)       |
| 10.5 | 1.0 | NP       | 39.9 | 8.0  | 143 | 6.8  | NP   | NP  | 45.5 | 7.0  | 15.4 | 11  |                                                  | P | USA | Mahon et al. (2003) (13)       |
| 10.5 | 1.3 | NP       | 37.3 | 7.3  | NP  | NP   | NP   | NP  | 51.8 | 4.3  | 8.3  | 18  |                                                  | M | USA | Rowland et al. (1993) (14)     |
| 10.6 | 1   | NP       | 38.0 | 10.0 | 143 | 7.0  | 18.0 | 3.0 | 50.0 | 9.0  | 18.0 | 61  | Year 1 of a<br>longitudinal study                | P | USA | Janz et al. (1998) (15)        |
| 10.6 | 0.2 | NP       | 36.4 | 1.8  | 144 | 2.0  | NP   | NP  | 49.5 | 1.1  | 2.2  | 11  |                                                  | M | USA | Del Corral et al. (1994) (16)  |
| 10.7 | 1   | NP       | 64.2 | 15.0 | 148 | 9.0  | 28.9 | 5.0 | 24.6 | 5.0  | 20.3 | 16  | Obese group                                      | P | USA | Rivas et al. (2019) (12)       |
| 10.8 | 1.0 | NP       | 39.0 | 11.0 | 144 | 7.0  | NP   | NP  | 49.0 | 8.0  | 16.3 | 63  |                                                  | M | USA | Janz et al. (2000) (17)        |
| 10.9 | 1.3 | NP       | 37.6 | 3.4  | 145 | 5.0  | NP   | NP  | 50.9 | 8.3  | 16.3 | 15  |                                                  | P | USA | Rowland (1997) (18)            |
| 11   | NP  | 9-12     | 87.2 | 21.8 | 157 | 11.0 | 31.8 | 6.5 | 22.6 | 4.5  | 19.9 | 15  | Healthy obese                                    | P | USA | DeStefano et al. (2000) (19)   |
| 7.6  | 0.4 | 6-18     | 27.0 | 4.0  | 126 | 5.0  | NP   | NP  | 48.0 | 5.0  | 10.4 | 36  |                                                  | M | Fra | Falgairette et al. (1991) (20) |
| 8.1  | 1.0 | NP       | 34.2 | 7.9  | 132 | 16.0 | NP   | NP  | 44.5 | 10.9 | 24.5 | 46  |                                                  | P | Spa | Guerrero et al. (2008) (21)    |
| 8.4  | NP  | NP       | 27.4 | 3.9  | 131 | 4.5  | NP   | NP  | 52.7 | 3.9  | 7.4  | 29  | Part of a longitudinal<br>study                  | M | Nor | Andersen et al. (1974) (22)    |
| 9    | NP  | 9        | 34.0 | 6.3  | 140 | 6.0  | 17.2 | 2.4 | 48.3 | 7.0  | 14.5 | 487 |                                                  | P | Nor | Steene-Johannessen (2009) (23) |
| 9    | NP  | 9        | 34.0 | 6.4  | 140 | 6.3  | NP   | NP  | 47.2 | 8.0  | 16.9 | 279 | Euro Youth Heart<br>Study                        | M | Eur | Wedderkopp et al. (2003) (24)  |
| 9    | NP  | 9        | 34.0 | 6.5  | 140 | 6.3  | 17.3 | 2.5 | 48.2 | 7.1  | 14.7 | 602 | Population-based<br>sample                       | P | Nor | Kolle et al. (2010) (25)       |
| 9    | NP  | 8.2-11.3 | 33.5 | 6.7  | 139 | 6.3  | 17.3 | 2.6 | 50.5 | 8.7  | 17.2 | 9   | Euro. Youth Heart<br>Study(4 Nations)            | P | Eur | Adegboye et al. (2011) (26)    |
| 9.3  | 0.7 | 9-10     | 32.0 | 4.0  | 137 | 5.0  | NP   | NP  | 50.0 | 7.0  | 14.0 | 27  |                                                  | M | Fra | Falgairette et al. (1991) (20) |
| 9.4  | 0.3 | 9-14     | 31.0 | 4.5  | 137 | 4.8  | NP   | NP  | 54.4 | 5.2  | 9.6  | 29  | Longitudinal study;<br>2ndear                    | M | Nor | Andersen et al. (1976) (27)    |

|      |      |          |      |      |     |      |      |     |       |      |      |     |                                       |   |          |                                   |
|------|------|----------|------|------|-----|------|------|-----|-------|------|------|-----|---------------------------------------|---|----------|-----------------------------------|
| 9.5  | 0.3  | 9        | 33.4 | 6.2  | 139 | 6.0  | 17.2 | 2.4 | 42.3  | 6.9  | 16.3 | 269 | European Youth Heart Study            | M | Eur      | Ortega et al. (2010) (28)         |
| 9.5  | 0.4  | NP       | 32.4 | 5.8  | 138 | 6.0  | 16.9 | 2.1 | 42.5  | 6.0  | 14.1 | 347 | European Youth Heart Study            | M | Eur      | Ortega et al. (2010) (28)         |
| 9.6  | 0.9  | 8-10     | NP   | NP   | NP  | NP   | NP   | NP  | 42.6  | 8.3  | 19.5 | 279 | 20% overweight; 21% obese             | P | Can      | Herman et al. (2015) (29)         |
| 9.8  | 0.5  | 8-11     | 35.8 | 7.4  | 142 | 6.0  | NP   | NP  | 52.0  | 8.1  | 15.6 | 177 | VO <sub>2max</sub> = 45.1-54.6        | P | Fin      | Agbaje et al. (2019) (30)         |
| 9.9  | 0.6  | 8.6-11.1 | 34.4 | 6.9  | 141 | 6.5  | 17.4 | 2.6 | 42.0  | 7.0  | 16.7 | 127 | VO <sub>2max</sub> =22.0-58.3         | P | Sca      | Dencker et al. (2006) (31)        |
| 9.9  | 0.6  | NP       | 34.4 | 6.9  | 140 | 6.5  | 17.4 | 2.6 | 42.0  | 7.0  | 16.7 | 113 | Baseline                              | P | Swe      | Danielson et al (2018) (32)       |
| 9.9  | 2.3  | 6-17     | 34.4 | 10.6 | 141 | 13.6 | NP   | NP  | 46.3  | 6.8  | 14.7 | 70  |                                       | M | Ger      | Foraita et al. (2015) (33)        |
| 9.9  | 0.4  | NP       | 32.2 | 3.4  | 141 | 4.6  | NP   | NP  | 46.7  | 6.1  | 13.1 | 28  | BMI in categories; most were "normal" | M | Nor      | Andersen & Ghesquiere (1972) (34) |
| 9.9  | NP   | 9.5-10.1 | 35.6 | NP   | 142 | 11.2 | NP   | NP  | 51.9  | 15.5 | 29.9 | 71  | Part of the PANIC study               | P | Fin      | Lintu et al. (2015) (35)          |
| 9.9  | 0.3  | NP       | 32.0 | 4.0  | 138 | 5.0  | NP   | NP  | 47.7  | 7.4  | 15.5 | 31  |                                       | P | UK       | McNarry et al. (2015) (36)        |
| 10   | NP   | 9-10     | 26.7 | NP   | 134 | NP   | 14.8 | NP  | 44.6  | NP   |      | 87  | VO <sub>2max</sub> = 43.3-45.8; MWCE  | M | Tan      | Aandstad et al. (2006) (37)       |
| 10   | NP   | 9-10     | 33.5 | NP   | 140 | NP   | 17.0 | NP  | 45.9  | NP   |      | 195 | VO <sub>2max</sub> = 44.9-46.9; MWCE  | M | Nor      | Aandstad et al. (2006) (37)       |
| 10.4 | NP   | 10       | 33.9 | 5.0  | 141 | 5.5  | NP   | NP  | 60.0  | 6.5  | 10.8 | 31  | Year 3 of a longitudinal study        | M | Nor      | Rutenfranz et al. (1981) (38)     |
| 10.5 | 0.5  | 10-11    | 37.2 | 6.6  | 141 | 4.7  | NP   | NP  | 46.1  | 6.0  | 13.0 | 50  | Control group                         | M | Fra      | Mandigout et al. (2001) (39)      |
| 10.6 | 0.3  | NP       | 36.3 | 6.2  | 143 | 7.0  | NP   | NP  | 47.4  | 5.5  | 11.6 | 25  |                                       | P | UK       | Fawknner & Armstrong (2004) (40)  |
| 10.7 | 0.4  | NP       | 36.0 | 5.0  | 141 | 5.0  | NP   | NP  | 53.7  | 6.1  | 11.4 | 48  | Low altitude, high SES                | M | Bol      | Fellmann et al. (1994) (41)       |
| 10.7 | 0.8  | NP       | 31.0 | 4.0  | 132 | 4.0  | NP   | NP  | 51.6  | 5.9  | 11.4 | 30  | Low altitude, low SES                 | M | Bol      | Fellmann et al. (1994) (41)       |
| 10.7 | 0.4  | 10-11    | 37.3 | 7.5  | 143 | 6.1  | NP   | NP  | 47.2  | 7.9  | 16.7 | 35  | Training group (pre)                  | M | Fra      | Mandigout et al. (2001) (39)      |
| 10.8 | 0.4  | NP       | 34.9 | 5.2  | 146 | 6.0  | NP   | NP  | 53.4  | 5.3  | 9.9  | 45  |                                       | M | Aus      | Gaisl & Buchberger (1980) (42)    |
| 10.8 | NP   | 9-10     | 35.2 | 5.9  | 142 | 6.7  | NP   | NP  | 48.8  | 8.8  | 18.0 | 62  |                                       | M | Can      | Cunningham et al. (1984) (43)     |
| 10.9 | 0.7  | NP       | 30.0 | 4.0  | 131 | 5.0  | NP   | NP  | 46.7  | 7.5  | 16.1 | 44  | High altitude, low SES                | M | Bol      | Fellmann et al. (1994) (41)       |
| 11.0 | 1.0  | NP       | 37.0 | 8.0  | 144 | 7.0  | NP   | NP  | 45.7  | 9.3  | 20.4 | 25  |                                       | M | Fra/Net/ | Boissiere et al. (2013) (44)      |
| 8.8  | 0.93 | 5-9      | 32.2 | 6.0  | 138 | 7.0  | 16.9 | 2.1 | 45.86 | 5.94 |      | 40  | excluded BMI over 30 and athletes     | M | Bel      | Van der Steeg 2021                |

|      |     |         |      |      |     |     |      |     |      |      |      |    |                                           |   |     |                                                                    |
|------|-----|---------|------|------|-----|-----|------|-----|------|------|------|----|-------------------------------------------|---|-----|--------------------------------------------------------------------|
| 7.4  | 0.3 | 7       | 26.3 | 4.4  | 126 | 5.1 | NP   | NP  | 47.0 | 5.8  | 12.3 | 18 | Test of a field procedure                 | M | Fra | Van Praagh et al. (1988) (45)                                      |
| 7.7  | 0.3 | NP      | 27.4 | 3.4  | 130 | 4.4 | NP   | NP  | 55.5 | 7.0  | 12.6 | 18 |                                           | M | Fin | Tompuri et al. (2015) (46)                                         |
| 8.2  | NP  | 8       | NP   | NP   | NP  | NP  | NP   | NP  | 49.0 | 9.2  | 18.8 | 21 |                                           | M | Nor | Rutenfranz et al. (1990) (47)<br>Sunnegardh & Bratteby (1987) (48) |
| 8.7  | NP  | 8.3-9.8 | 27.6 | 3.6  | 132 | 6.1 | NP   | NP  | 52.7 | 6.3  | 12.0 | 20 |                                           | M | Swe |                                                                    |
| 9    | NP  | 8-10    | 26.2 | 2.8  | 130 | 4.4 | NP   | NP  | 50.0 | 6.5  | 13.0 | 19 | Used IBP Handbook (1969)                  | M | Jap | Ikai & Kitagawa (1972) (49)                                        |
| 9.7  | 0.7 |         | 45.6 | 6.3  | 141 | 5.4 | 22.7 | 2.5 | 33.8 | 4.7  | 13.9 | 16 | Obese prepubertal boys                    | P | Fra | Zunquin et al. (2009) (50)                                         |
| 10   | NP  | 10      | 33.3 | 6.6  | 139 | 7.4 | NP   | NP  | 55.4 | 6.2  | 11.2 | 20 |                                           | M | Can | Massicotte et al. (1985) (51)                                      |
| 10   | NP  | 10      | NP   | NP   | NP  | NP  | NP   | NP  | 44.2 | 3.8  | 8.6  | 15 | Rural boys                                | M | Jap | Yoshizawa (1972) (52)                                              |
| 10   | NP  | 10      | 35.2 | 6.7  | 142 | 6.0 | NP   | NP  | 47.4 | 7.0  | 14.8 | 20 | Have PE class 8 times/week                | M | Aut | Petzl et al. (1988) (53)                                           |
| 10.2 | NP  | 10      | NP   | NP   | NP  | NP  | NP   | NP  | 50.5 | 10.4 | 20.6 | 19 |                                           | M | Nor | Rutenfranz et al. (1990) (47)                                      |
| 10.3 | 0.8 | 9-12    | 32.9 | 5.4  | 141 | 6.2 | 16.2 | 1.3 | 38.4 | 3.8  | 9.9  | 20 | Normal-weight parents                     | P | Isr | Weinstein et al. (2004) (54)                                       |
| 10.3 | 0.8 | 9-12    | 31.5 | 3.1  | 140 | 5.5 | 16   | 1.1 | 40.4 | 4.9  | 12.1 | 20 | One obese parent                          | P | Isr | Weinstein et al. (2004) (54)                                       |
| 10.3 | 0.9 | NP      | 36.9 | 9.1  | 142 | 7.1 | NP   | NP  | 43.5 | 5.2  | 12.0 | 15 |                                           | M | Fra | Leclair et al. (2011) (55)                                         |
| 10.3 | 0.8 | NP      | 32.9 | 2.0  | 138 | 2.0 | 17.1 | 0.7 | 40.0 | 2.1  | 5.3  | 18 | Lean subjects                             | P | Tha | Chuensiri et al. (2015) (56)                                       |
| 10.3 | 0.9 | NP      | 38.9 | 10.2 | 142 | 7.0 | NP   | NP  | 43.8 | 5.2  | 11.9 | 15 | VO <sub>2max</sub> = 38.0-58.9            | P | Fra | Leclair et al. (2013) (57)                                         |
| 10.3 | 0.2 | 8-12    | NP   | NP   | NP  | NP  | NP   | NP  | 51.4 | 1.1  | 2.1  | 16 | Trained: test of exercise-induced hypoxia | M | Fra | Nourry et al. (2004) (58)                                          |
| 10.4 | 0.2 | NP      | 57.9 | 3.0  | 150 | 3.0 | 25.4 | 3.3 | 30.8 | 1.9  | 6.2  | 17 | Obese subjects                            | P | Tha | Chuensiri et al. (2015) (56)                                       |
| 10.5 | 0.4 | NP      | 36.3 | 7.2  | 140 | 4.0 | NP   | NP  | 44.7 | 6.5  | 14.5 | 15 | Control group                             | P | H-K | McManus (2005) (59)                                                |
| 10.5 | NP  | 10      | 36.0 | NP   | NP  | NP  | NP   | NP  | 54.3 | NP   |      | 20 | VO <sub>2max</sub> =46-62 mL/kg-min       | M | Nor | Hermansen & Oseid (1971) (60)                                      |
| 10.6 | 0.3 | NP      | 37.9 | 5.4  | 144 | 4.6 | NP   | NP  | 47.9 | 7.0  | 14.6 | 17 |                                           | M | Fra | Vinet et al. (2003) (61)                                           |
| 10.6 | 0.3 | NP      | 35.5 | 5.4  | 141 | 5.6 | NP   | NP  | 56.6 | 7.7  | 13.6 | 15 | Competitive hockey players                | M | Can | Cunningham et al. (1976) (62)                                      |
| 10.8 | 0.5 | NP      | 37.6 | 7.4  | 148 | 7.3 | NP   | NP  | 54.4 | 7.6  | 14.0 | 18 |                                           | M | Can | Docherty & Gaul (1991) (63)                                        |
| 10.9 | 1.0 | NP      | 33.2 | 5.2  | 142 | 6.0 | NP   | NP  | 54.0 | 9.7  | 18.0 | 16 |                                           | M | Isr | Falk & Bar-Or (1993) (64)                                          |

|      |     |       |      |      |     |      |      |      |      |      |      |    |                                          |   |     |                                    |
|------|-----|-------|------|------|-----|------|------|------|------|------|------|----|------------------------------------------|---|-----|------------------------------------|
| 11   | NP  | 10-11 | 30.8 | 4.1  | 135 | 4.2  | NP   | NP   | 49.1 | 7.9  | 16.1 | 18 |                                          | M | Jap | Ikai & Kitagawa (1972) (49)        |
| 11   | 0.7 | NP    | 37.0 | 9.0  | 140 | 7.0  | NP   | NP   | 47.4 | 6.3  | 13.3 | 23 | High altitude, high SES                  | M | Bol | Fellmann et al. (1994) (41)        |
| 8.4  | NP  | 7-9   | 27.2 | 3.3  | 131 | 5.9  | NP   | NP   | 52.6 | 5.5  | 10.5 | 12 | Non-active in sports/ with a warmup      | M | Isr | Inbar & Bar-Or (1975) (65)         |
| 8.4  | NP  | 7-9   | 27.2 | 0.3  | 131 | 5.9  | NP   | NP   | 49.4 | 4.7  | 9.5  | 12 | Inactive, without warmup period          | M | Isr | Inbar & Bar-Or (1975) (65)         |
| 9    | NP  | 9     | NP   | NP   | NP  | NP   | NP   | NP   | 42.9 | 5.9  | 13.8 | 8  | Rural boys                               | M | Jap | Yoshizawa (1972) (52)              |
| 9.3  | 0.3 | 8-10  | 27.1 | 1.3  | NP  | NP   | NP   | NP   | 52.8 | 2.1  | 4.0  | 9  | Exercise in heated space                 | M | Isr | Inbar et al. (1981) (66)           |
| 9.5  | 0.3 | 9     | 34.7 | 6.2  | 141 | 6.3  | 17.4 | 2.5  | 50.3 | 6.8  | 13.5 | 10 | Test of new VO <sub>2peak</sub> equation | P | Ice | Arngrímsson et al. (2008) (67)     |
| 9.5  | 1.1 | 8-12  | 47.9 | 13.8 | 148 | 9.1  | 21.7 | 4.7  | 36.4 | 6.2  | 17.0 | 9  | Overweight group                         | P | Aus | Crisp et al. (2012) (68)           |
| 9.7  | 1.0 | NP    | 31.6 | 5.4  | 142 | 8.3  | 15.5 | 1.9  | 52.4 | 11.4 | 21.8 | 9  | Normal weight group                      | P | Aus | Crisp et al. (2012) (68)           |
| 9.7  | 0.3 | 8-10  | 32.2 | 4.8  | NP  | NP   | NP   | NP   | 54.1 | 6.6  | 12.2 | 9  | Exercise in air conditioning             | M | Isr | Inbar et al. (1981) (66)           |
| 9.9  | 0.6 | NP    | 41.7 | 13.9 | 140 | 5.7  | 20.9 | 5.9  | 39.2 | 7.8  | 19.9 | 12 | 42% overweight/obese                     | M | Chi | Garcia-Prieto et al. (2017) (69)   |
| 9.9  | 1.6 | 8-12  | 52.9 | 13.9 | 141 | 11.0 | 26.1 | 3.5  | 32.8 | 4.0  | 12.2 | 7  | Obese subjects; pre-exercise program     | M | Ita | Lazzer et al. (2008) (70)          |
| 10   | NP  | 10    | NP   | NP   | NP  | NP   | NP   | NP   | 45.1 | 2.3  | 5.1  | 5  | Urban boys                               | M | Jap | Yoshizawa (1972) (52)              |
| 10   | NP  | 10    | 36.4 | 1.7  | 139 | 8.0  | NP   | NP   | 47.1 | 10.2 | 21.7 | 11 | Have PE class 3 times/week               | M | Aut | Petzl et al. (1988) (53)           |
| 10.2 | NP  | 10    | 28.7 | 3.0  | 132 | 2.2  | NP   | NP   | 38.6 | 4.6  | 11.9 | 8  |                                          | M | Jap | Yamaji & Miyashita (1977) (71)     |
| 10.2 | 0.4 | NP    | 32.4 | 3.5  | 142 | 5.1  | NP   | NP   | 56.4 | 4.6  | 8.2  | 10 | Second experiment                        | P | Den | Hansen et al. (1989) (72)          |
| 10.3 | 0.1 | 10-11 | 38.9 | 5.6  | 145 | 4.0  | NP   | NP   | 45.5 | 3.4  | 7.5  | 10 | Interval training group (pre-training)   | P | H-K | McManus (2005) (59)                |
| 10.3 | NP  | NP    | 33.2 | 5.7  | 143 | 7.8  | NP   | NP   | 49.3 | 6.7  | 13.6 | 14 | Part of a longitudinal study             | P | Nor | Andersen et al. (1974) (22)        |
| 10.4 | 0.4 | NP    | 35.9 | 7.3  | 140 | 4.0  | NP   | NP   | 47.0 | 6.5  | 13.8 | 10 | Continuous training group (pre-training) | P | H-K | McManus (2005) (59)                |
| 10.5 | 0.7 | NP    | 51.0 | 9.0  | 146 | 5.2  | 24   | 3.4  | 51.5 | 7.5  | 14.6 | 14 |                                          | P | Can | Peralta-Huertas et al. (2008) (73) |
| 10.5 | 0.3 | 10-11 | 37.5 | 5.4  | 142 | 5.0  | NP   | NP   | 44.1 | 6.1  | 13.8 | 9  | Overweight boys                          | M | Fra | Obert et al. (2003) (74)           |
| 10.5 | 0.3 | 10-11 | 36.3 | 7.9  | 144 | 7.1  | NP   | NP   | 46.2 | 6.7  | 14.5 | 9  | Endurance training group (pre)           | M | Den | Hansen et al. (1989) (72)          |
| 10.5 | 1.1 | NP    | 32.9 | 5.1  | 142 | 7.5  | 16.3 | 1.10 | 49.0 | 7.9  | 16.1 | 12 | First experiment                         | M | Fra | Birat et al. (2018) (75)           |
|      |     |       |      |      |     |      |      |      |      |      |      |    | Inactive boys                            | M | Fra |                                    |

|      |     |       |      |     |       |      |      |     |      |       |      |    |                                 |   |     |                                       |
|------|-----|-------|------|-----|-------|------|------|-----|------|-------|------|----|---------------------------------|---|-----|---------------------------------------|
| 10.5 | 0.8 | NP    | 34.8 | 6.0 | 142   | 7.4  | NP   | NP  | 43.5 | 5.4   | 12.4 | 8  | Training group (pre-experiment) | P | Isr | Dotan et al. (2000) (76)              |
| 10.6 | 0.9 | NP    | 34.7 | 6.9 | 143   | 7.1  | NP   | NP  | 46.6 | NP    |      | 12 |                                 | P | UK  | Tolfrey et al. (1998) (77)            |
| 10.6 | 0.3 | 10-11 | 36.9 | 6.1 | 143   | 5.0  | NP   | NP  | 51.5 | 6.3   | 12.2 | 9  | Control group (pre)             | M | Fra | Obert et al. (2003) (74)              |
| 10.6 | 1.0 | NP    | 35.0 | 5.0 | 142   | 10.0 | NP   | NP  | 48.0 | 8.0   | 16.7 | 10 |                                 | M | Fra | Martin et al. (2002) (78)             |
| 10.7 | 0.9 | NP    | 35.7 | 6.6 | 147   | 8.4  | NP   | NP  | 48.0 | 6.0   | 12.5 | 9  |                                 | P | Bel | Vandekerckhove et al. (2016) (79)     |
| 11   | NP  | 10-11 | 35.3 | 8.1 | 141   | 5.5  | 17.6 | 3.2 | 50.1 | 12.4  | 24.8 | 12 | Deaf boys                       | M | Pol | Zebrowska & Zwierzchowska (2009) (80) |
| 11   | NP  | 10-11 | 33.4 | 7.2 | 143   | 8.4  | 16.3 | 2.3 | 52.9 | 12.2  | 23.1 | 12 | Normal hearing boys             | M | Pol | Zebrowska & Zwierzchowska (2009) (80) |
| 8.1  | 0.3 | 7-10  | 27.8 | 1.7 | 132   | 1.7  | 15.8 | 0.6 | 47.3 | 5.00  |      | 12 | healthy boys                    | P | Ger | Schöffl et al. (2020) (81)            |
| 10.7 | 0.8 | 9-11  | 43.4 | 8.6 | 146.2 | 4.5  | 20.2 | 3.1 | 43.0 | 3.6   |      | 11 | healthy boys                    | P | Bra | Langer et al. 2020 (82)               |
| 9.6  | 2.8 | 7-11  | 36.2 | 6.8 | 140   | 8.7  | 17.7 | 4.8 | 46.3 | 10.20 |      | 14 |                                 |   | Fin | Haapala et al. 2021 (83)              |

(Y=years,  $VO_{2max}$ =maximal oxygen consumption, NP=not provided, BSA=body surface area, LBM=lean body mass, PR=Puerto Rico , Fra=France, Spa=Spain, Nor=Norway, Eur=Europe, Can=Canada, Fin=Finland, Sca=Scandinavian countries, Swe=Sweden, Ger=Germany, Tan=Tanzania, Bol=Bolivia, Aus=Australia, Net\*Netherlands, Bel=Belgium, Jap=Japan, Aut=Austria, Isr=Israel, H-K=Hong Kong, Ice=Iceland, Chi=China, Ita=Italy, Den=Denmark, Pol=Poland, Bra=Brasil)

## References

1. Springer C, Barstow TJ, Wasserman K, Cooper DM. Oxygen uptake and heart rate responses during hypoxic exercise in children and adults. *Med Sci Sports Exerc.* 1991;23(1):71–9.
2. Washington RL, van Gundy JC, Cohen C, Sondheimer HM, Wolfe RR. Normal aerobic and anaerobic exercise data for North American

school-age children. *J Pediatr*. 1988;112(2):223–33.

3. McMurray RG, Harrell JS, Bradley C, Deng S, Bangdiwala SI. Predicted maximal aerobic power in youth is related to gender, ethnicity, and body composition. *Med Sci Sport Exerc*. 2001;33(5):S31.
4. Sockolov R, Irwin B, Dressendorfer RH, Bernauer EM. Exercise performance in 6 to 11 year old boys with Duchenne muscular dystrophy. *Arch Phys Med Rehabil*. 1977;58(5):195–201.
5. Rivera-Brown AM, Alvarez M, Rodríguez-Santana JR, Benetti PJ. Anaerobic power and achievement of  $\dot{V}O_2$  plateau in pre-pubertal boys. *Int J Sports Med*. 2001;22(2):111–5.
6. Turley KR, Wilmore JH. Cardiovascular responses to submaximal exercise in 7- to 9-yr-old boys and girls. *Med Sci Sports Exerc*. 1997;29(6):824–32.
7. Gilliam TB, Katch VL, Thorland W, Weltman A. Prevalence of coronary heart disease risk factors in active children, 7 to 12 years of age. *Med Sci Sports Exerc*. 1977;9(1):21–5.
8. Barkley JE, Roemmich JN. Validity of the CALER and OMNI-bike ratings of perceived exertion. *Med Sci Sports Exerc*. 2008;40(4):760–6.
9. Swain KE, Rosenkranz SK, Beckman B, Harms CA. Expiratory flow limitation during exercise in prepubescent boys and girls: prevalence

and implications. *J Appl Physiol*. 2010;108(5):1267–74.

10. Robertson RJ, Goss FL, Boer N, et al. OMNI scale perceived exertion at ventilatory breakpoint in children: Response normalized. *Med Sci Sports Exerc*. 2001;33(11):1946–52.
11. Cooper DM, Weiler-Ravell D, Whipp BJ, Wasserman K. Aerobic parameters of exercise as a function of body size during growth in children. *J Appl Physiol Respir Environ Exerc Physiol*. 1984;56(3):628–34.
12. Rivas E, Huynh H, Galassetti PR. Obesity Affects Submaximal Oxygen Uptake-Heart Rate Relationship and Exercise Economy Differently in Pre- and Post-pubescent Boys and Girls. *Int J Exerc Sci*. 2019;12(3):748–63.
13. Mahon AD, Anderson CS, Hipp MJ, Hunt KA. Heart Rate Recovery from Submaximal Exercise in Boys and Girls. *Med Sci Sports Exerc*. 2003;35(12):2093–7.
14. Rowland TW, Rambusch JM, Staab JS, Unnithan VB, Siconolfi SF. Accuracy of physical working capacity (PWC170) in estimating aerobic fitness in children. *J Sports Med Phys Fitness*. 1993;33(2):184–8.
15. Janz KF, Burns TL, Witt JD, Mahoney LT. Longitudinal analysis of scaling  $\dot{V}O_2$  for differences in body size during puberty: The muscatine study. *Med Sci Sports Exerc*. 1998;30(9):1436–44.
16. Del Corral P, Mahon AD, Duncan GE, Howe CA, Craig BW. The effect of exercise on serum and salivary cortisol in male children. *Med*



*Sci Sports Exerc.* 1994;26(11):1297–301.

17. Janz KF, Dawson JD, Mahoney LT. Tracking physical fitness and physical activity from childhood to adolescence: The Muscatine study. *Med Sci Sports Exerc.* 2000;32(7):1250–7.
18. Rowland TW. *The development of aerobic fitness in children*. London: E & FN Spon.; 1997. 179–189 p.
19. DeStefano RA, Caprio S, Fahey JT, Tamborlane W V, Goldberg B. Changes in body composition after a 12-wk aerobic exercise program in obese boys. *Pediatr Diabetes.* 2000;1(2):61–5.
20. Falgairette G, Bedu M, Fellmann N, Van-Praagh E, Coudert J. Bio-energetic profile in 144 boys aged from 6 to 15 years with special reference to sexual maturation. *Eur J Appl Physiol Occup Physiol.* 1991;62(3):151–6.
21. Guerrero L, Naranjo J, Carranza MD. Influence of gender on ventilatory efficiency during exercise in young children. *J Sports Sci.* 2008;26(13):1455–7.
22. Lange Andersen K, Seliger V, Rutenfranz J, Mocellin R. Physical performance capacity of children in Norway - Part I. Population parameters in a rural inland community with regard to maximal aerobic power. *Eur J Appl Physiol Occup Physiol.* 1974;33(3):177–95.
23. Steene-Johannessen J, Anderssen SA, Kolle E, Andersen LB. Low muscle fitness is associated with metabolic risk in youth. *Med Sci Sports Exerc.* 2009;41(7):1361–7.

24. Wedderkopp N, Froberg K, Hansen HS, Riddoch C, Andersen LB. Cardiovascular Risk Factors Cluster in Children and Adolescents with Low Physical Fitness: The European Youth Heart Study (EYHS). *Pediatr Exerc Sci*. 2003;15(4):419–27.
25. Kolle E, Steene-Johannessen J, Andersen LB, Anderssen SA. Objectively assessed physical activity and aerobic fitness in a population-based sample of Norwegian 9- and 15-year-olds. *Scand J Med Sci Sport* [Internet]. 2010 [cited 2022 Jun 30];20(1) Available from: <https://pubmed.ncbi.nlm.nih.gov/19422647/>. doi:10.1111/j.1600-0838.2009.00892.x.
26. Adegboye ARA, Anderssen SA, Froberg K, et al. Recommended aerobic fitness level for metabolic health in children and adolescents: A study of diagnostic accuracy. *Br J Sports Med*. 2011;45(9):722–8.
27. Lange Andersen K, Seliger V, Rutenfranz J, Skrobak-Kaczynski J. Physical performance capacity of children in Norway - Part IV. The rate of growth in maximal aerobic power and the influence of improved physical education of children in a rural community - population parameters in a rural community. *Eur J Appl Physiol Occup Physiol*. 1976;35(1):49–58.
28. Ortega FB, Ruiz JR, Hurtig-Wennlöf A, et al. Cardiovascular fitness modifies the associations between physical activity and abdominal adiposity in children and adolescents: The European youth heart study. *Br J Sports Med*. 2010;44(4):256–62.
29. Herman KM, Chaput JP, Sabiston CM, Mathieu ME, Tremblay A, Paradis G. Combined physical activity/sedentary behavior associations with indices of adiposity in 8- to 10-year-old children. *J Phys Act Heal*. 2015;12(1):20–9.
30. Agbaje AO, Haapala EA, Lintu N, et al. Peak oxygen uptake cut-points to identify children at increased cardiometabolic risk – The

PANIC Study. *Scand J Med Sci Sport*. 2019;29(1):16–24.

31. Dencker M, Thorsson O, Karlsson MK, et al. Daily physical activity and its relation to aerobic fitness in children aged 8-11 years. *Eur J Appl Physiol*. 2006;96(5):587–92.
32. Danielson A, Thorsson O, Karlsson MK, Wollmer P, Andersen LB, Dencker M. School-based study found that physical activity and aerobic fitness predicted increases in total body fat and abdominal fat at a mean age of 9.8 years. *Acta Paediatr Int J Paediatr*. 2018;107(10):1810–7.
33. Foraita R, Brandes M, Günther F, Bammann K, Pigeot I, Ahrens W. The influence of aerobic fitness on obesity and its parent-offspring correlations in a cross-sectional study among German families. *BMC Public Health* [Internet]. 2015 [cited 2022 Jun 30];15(1) Available from: <https://pubmed.ncbi.nlm.nih.gov/26162746/>. doi:10.1186/s12889-015-2013-x.
34. Andersen KL, Ghesquiere J. Sex differences in maximal oxygen uptake, heart rate and oxygen pulse at 10 and 14 years in Norwegian children. *Hum Biol*. 1972;44(3):413–31.
35. Lintu N, Viitasalo A, Tompuri T, et al. Cardiorespiratory fitness, respiratory function and hemodynamic responses to maximal cycle ergometer exercise test in girls and boys aged 9–11 years: the PANIC Study. *Eur J Appl Physiol*. 2015;115(2):235–43.
36. McNarry MA, Farr C, Middlebrooke A, et al. Aerobic Function and Muscle Deoxygenation Dynamics during Ramp Exercise in Children. *Med Sci Sports Exerc*. 2015;47(9):1877–84.

37. Aandstad A, Berntsen S, Hageberg R, Klasson-Heggebø L, Anderssen SA. A comparison of estimated maximal oxygen uptake in 9 and 10-year old schoolchildren in Tanzania and Norway. *Br J Sports Med*. 2006;40(4):287–92.
38. Rutenfranz J, Andersen KL, Seliger V, Klimmer F, Berndt I, Ruppel M. Maximum aerobic power and body composition during the puberty growth period: Similarities and differences between children of two European countries. *Eur J Pediatr*. 1981;136(2):123–33.
39. S M, AM L, D C, P G, P O. Effect of gender in response to an aerobic training programme in prepubertal children. *Acta Paediatr*. 2001;90(1):9–15.
40. Fawcner SG, Armstrong N. Sex differences in the oxygen uptake kinetic response to heavy-intensity exercise in prepubertal children. *Eur J Appl Physiol*. 2004;93(1–2):210–6.
41. Fellmann N, Beaune B, Coudert J. Blood lactate after maximal and supramaximal exercise in 10- to 12-year-old Bolivian boys effects of altitude and socioeconomic status. *Int J Sports Med* [Internet]. 1994 [cited 2022 Jun 30];15(SUPPL. 2) Available from: <https://pubmed.ncbi.nlm.nih.gov/8056467/>. doi:10.1055/s-2007-1021119.
42. Gaisl G, Buchberger J. *Determination of the aerobic and anaerobic thresholds of 10-11-year-old boys using blood-gas analysis*. Baltimore: University Park Press; 1980. 93–98 p.
43. Cunningham DA, Paterson DH, Blimkie CJR, Donner AP. Development of cardiorespiratory function in circumpubertal boys: A longitudinal study. *J Appl Physiol Respir Environ Exerc Physiol*. 1984;56(2):302–7.

44. Boissière J, Maufrais C, Baquet G, et al. Specific left ventricular twist-untwist mechanics during exercise in children. *J Am Soc Echocardiogr*. 2013;26(11):1298–305.
45. Van Praagh E, Bedu M, Falgairette G, Fellmann N, Coudert J. Comparaison entre over VO2 max direct et indirect chez l'enfant de 7 et 12 ans. Validation d'une épreuve de terrain. *Sci Sport*. 1988;3(4):327–32.
46. Tompuri T, Lintu N, Savonen K, et al. Measures of cardiorespiratory fitness in relation to measures of body size and composition among children. *Clin Physiol Funct Imaging*. 2015;35(6):469–77.
47. Rutenfranz J, Máček M, Lange Andersen K, et al. The relationship between changing body height and growth related changes in maximal aerobic power. *Eur J Appl Physiol Occup Physiol*. 1990;60(4):282–7.
48. Sunnegårdh J, Bratteby LE. Maximal oxygen uptake, anthropometry and physical activity in a randomly selected sample of 8 and 13 year old children in Sweden. *Eur J Appl Physiol Occup Physiol*. 1987;56(3):266–72.
49. Ikai M, Kitagawa K. Maximum oxygen uptake of Japanese related to sex and age. *Med Sci Sports Exerc*. 1972;4(3):127–31.
50. Zunquin G, Theunynck D, Sesboué B, Arhan P, Bouglé D. Evolution of fat oxidation during exercise in obese pubertal boys: Clinical implications. *J Sports Sci*. 2009;27(4):315–8.
51. Massicotte DR, Gauthier R, Markon P. Prediction of VO2max from the running performance in children aged 10-17 years. *J Sports Med*

*Phys Fitness*. 1985;25(1–2):10–7.

52. Yoshizawa S. A comparative study of aerobic work capacity in urban and rural adolescents. *J Hum Ergol (Tokyo)*. 1972;1(1):45–65.
53. Petzl DH, Haber P, Schuster E, Popow C, Haschke F. Reliability of estimation of maximum performance capacity on the basis of submaximum ergometric stress tests in children 10-14 years old. *Eur J Pediatr*. 1988;147(2):174–8.
54. Weinstein Y, Kamerman T, Berry E, Falk B. Mechanical Efficiency of Normal-Weight Prepubertal Boys Predisposed to Obesity. *Med Sci Sports Exerc*. 2004;36(4):567–73.
55. Leclair E, Mucci P, Borel B, Baquet G, Carter H, Berthoin S. Time to exhaustion and time spent at a high percentage of Vo<sub>2</sub>max in severe intensity domain in children and adults. *J Strength Cond Res*. 2011;25(4):1151–8.
56. Chuensiri N, Tanaka H, Suksom D. The acute effects of supramaximal high-intensity intermittent exercise on vascular function in Lean vs. Obese prepubescent boys. *Pediatr Exerc Sci*. 2015;27(4):503–9.
57. Leclair E, Berthoin S, Borel B, et al. Faster pulmonary oxygen uptake kinetics in children vs adults due to enhancements in oxygen delivery and extraction. *Scand J Med Sci Sport*. 2013;23(6):705–12.
58. Nourry C, Fabre C, Bart F, Grosbois JM, Berthoin S, Mucci P. Evidence of Exercise-Induced Arterial Hypoxemia in Prepubescent Trained Children. *Pediatr Res*. 2004;55(4):674–81.

59. McManus AM, Cheng CH, Leung MP, Yung TC, Macfarlane DJ. Improving aerobic power in primary school boys: A comparison of continuous and interval training. *Int J Sports Med*. 2005;26(9):781–6.
60. Hermansen L, Oseid S. Direct and indirect estimation of maximal oxygen uptake in pre-pubertal boys. *Acta Paediatr Scand Suppl*. 1971;217:18–23.
61. Vinet A, Mandigout S, Nottin S, et al. Influence of Body Composition, Hemoglobin Concentration, and Cardiac Size and Function of Gender Differences in Maximal Oxygen Uptake in Prepubertal Children. *Chest*. 2003;124(4):1494–9.
62. Cunningham DA, Telford P, Swart GT. The cardiopulmonary capacities of young hockey players: Age 10. *Med Sci Sports Exerc*. 1976;8(1):23–5.
63. Docherty D, Gaul CA. Relationship of body size, physique, and composition to physical performance in young boys and girls. *Int J Sports Med*. 1991;12(6):525–32.
64. Falk B, Bar-Or O. Longitudinal Changes in Peak Aerobic and Anaerobic Mechanical Power of Circumpubertal Boys. *Pediatr Exerc Sci*. 1993;5(4):318–31.
65. Inbar O, Bar-Or O. The effects of intermittent warm-up on 7-9-year-old boys. *Eur J Appl Physiol Occup Physiol*. 1975;34(1):81–9.
66. Inbar O, Bar-Or O, Dotan R, Gutin B. Conditioning versus exercise in heat as methods for acclimatizing 8- to 10-yr-old boys to dry heat. *J*

*Appl Physiol Respir Environ Exerc Physiol.* 1981;50(2):406–11.

67. Arngrímsson SÁ, Sveinsson T, Jóhannsson E. Peak oxygen uptake in children: Evaluation of an older prediction method and development of a new one. *Pediatr Exerc Sci.* 2008;20(1):62–73.
68. Crisp NA, Guelfi KJ, Licari MK, Braham R, Fournier PA. Does exercise duration affect Fat max in overweight boys? *Eur J Appl Physiol.* 2012;112(7):2557–64.
69. García-Prieto JC, Martinez-Vizcaino V, García-Hermoso A, et al. Energy expenditure in playground games in primary school children measured by accelerometer and heart rate monitors. *Int J Sport Nutr Exerc Metab.* 2017;27(5):467–74.
70. Lazzer S, Molin M, Stramare D, Facchini S, Francescato MP. Effects of an eight-month weight-control program on body composition and lipid oxidation rate during exercise in obese children. *J Endocrinol Invest.* 2008;31(6):509–14.
71. Yamaji K, Miyashita M. Oxygen transport system during exhaustive exercise in Japanese boys. *Eur J Appl Physiol Occup Physiol.* 1977;36(2):93–9.
72. Hansen HS, Froberg K, Nielsen JR, Hyldebrandt N. A new approach to assessing maximal aerobic power in children: the Odense School Child Study. *Eur J Appl Physiol Occup Physiol.* 1989;58(6):618–24.
73. Peralta-Huertas J, Livingstone K, Banach A, Klentrou P, O’Leary D. Differences in left ventricular mass between overweight and normal-



weight preadolescent children. *Appl Physiol Nutr Metab*. 2008;33(6):1172–80.

74. Obert P, Mandigouts S, Nottin S, Vinet A, N’Guyen LD, Lecoq AM. Cardiovascular responses to endurance training in children: Effect of gender. *Eur J Clin Invest*. 2003;33(3):199–208.
75. Birat A, Bourdier P, Piponnier E, et al. Metabolic and fatigue profiles are comparable between prepubertal children and well-trained adult endurance athletes. *Front Physiol* [Internet]. 2018 [cited 2022 Jun 30];9(APR) Available from: <https://pubmed.ncbi.nlm.nih.gov/29740332/>. doi:10.3389/fphys.2018.00387.
76. Dotan R, Falk B, Raz A. Intensity effect of active recovery from glycolytic exercise on decreasing blood lactate concentration in prepubertal children. *Med Sci Sports Exerc*. 2000;32(3):564–70.
77. Tolfrey K, Campbell IG, Batterham AM. Aerobic trainability of prepubertal boys and girls. *Pediatr Exerc Sci*. 1998;10(3):248–63.
78. Martin R, Hautier C, Bedu M. Effect of age and pedalling rate on cycling efficiency and internal power in humans. *Eur J Appl Physiol*. 2002;86(3):245–50.
79. Vandekerckhove K, Coomans I, Moerman A, De Wolf D, Boone J. Characterizing cerebral and locomotor muscle oxygenation to incremental ramp exercise in healthy children: relationship with pulmonary gas exchange. *Eur J Appl Physiol*. 2016;116(11–12):2345–55.
80. Zebrowska A, Zwierzchowska A. Spirometric values and aerobic efficiency of children and adolescents with hearing loss. *J Physiol*

*Pharmacol.* 2006;57(SUPPL. 4):443–7.

81. Schöffl I, Ehrlich B, Stanger S, Rottermann K, Dittrich S, Schöffl V. Exercise Field Testing in Children: A New Approach for Age-Appropriate Evaluation of Cardiopulmonary Function. *Pediatr Cardiol.* 2020;41(6):1099–106.
82. Langer RD, da Costa KG, Bortolotti H, Fernandes GA, de Jesus RS, Gonçalves EM. Phase angle is associated with cardiorespiratory fitness and body composition in children aged between 9 and 11 years. *Physiol Behav* [Internet]. 2020 [cited 2022 May 28];215 Available from: <https://pubmed.ncbi.nlm.nih.gov/31837386/>. doi:10.1016/j.physbeh.2019.112772.
83. Haapala EA, Gao Y, Hartikainen J, Rantalainen T, Finni T. Associations of fitness, motor competence, and adiposity with the indicators of physical activity intensity during different physical activities in children. *Sci Rep* [Internet]. 2021 [cited 2022 May 28];11(1) Available from: <https://pubmed.ncbi.nlm.nih.gov/34131258/>. doi:10.1038/s41598-021-92040-2.
