# Supplementary material for: A Meta-Analysis of Sampled Maximal Aerobic Capacity Data for Boys Aged 11 Years Old or Less Obtained by Cycle Ergometry
Source: MDPI journal article supplement (doi:10.3390/life13020276), 2023-01-19
Supplement: s1 [file s1]

# Supplementary file S1

Table S1: Included Studies for Absolute VO<sub>2max/peak</sub> values (Lmin<sup>-1</sup>)

| Age  |     | Age range | Body Mass |      | Height |      | BMI                  |                      | VO <sub>2max</sub>    |                       | COV   |    | Additional Comments                 | Peak (P) or max (M) VO <sub>2</sub> | Location | Reference                      |
|------|-----|-----------|-----------|------|--------|------|----------------------|----------------------|-----------------------|-----------------------|-------|----|-------------------------------------|-------------------------------------|----------|--------------------------------|
| Mean | SD  |           | Mean      | SD   | Mean   | SD   | Mean                 | SD                   | Mean                  | SD                    | ( % ) | n  |                                     |                                     |          |                                |
| (y)  | (y) |           | (kg)      | (kg) | (cm)   | (cm) | (kg/m <sup>2</sup> ) | (kg/m <sup>2</sup> ) | (Lmin <sup>-1</sup> ) | (Lmin <sup>-1</sup> ) |       |    |                                     |                                     |          |                                |
| 7.5  | 0.8 | 7-12      | 24.0      | 2.3  | 126    | 6    | NP                   | NP                   | 1.10                  | 0.19                  | 17.3  | 22 | BSA<1.0 m <sup>3</sup>              | M                                   | USA      | Washington et al. (1988) (1)   |
| 8    | NP  | 8         | 32.7      | 6.6  | 133    | 5.0  | 18.3                 | 2.8                  | 1.44                  | 0.31                  | 21.5  |    | African-American                    | M                                   | USA      | McMurray et al. (2002) (2)     |
| 8    | NP  | 8         | 30.7      | 6.0  | 132    | 6.0  | 17.5                 | 2.6                  | 1.39                  | 0.23                  | 16.5  |    | Caucasian                           | M                                   | USA      | McMurray et al. (2002) (2)     |
| 8.4  | 1.3 | NP        | 27.0      | 4.7  | 128    | 6.6  | NP                   | NP                   | 1.08                  | 0.24                  | 22.2  | 13 | Normal, untrained sample            | P                                   | USA      | Sokolov et al. (1977) (3)      |
| 8.6  | 2.0 | NP        | 27.6      | 6.9  | 132    | 11.3 | NP                   | NP                   | 1.10                  | 0.30                  | 27.3  | 6  | VO2max plateau group                | M                                   | PR       | Rivera-Brown et al. (2001) (4) |
| 8.9  | 0.6 | 7-9       | 30.4      | 5.2  | 132    | 4.7  | 17.4                 | 2.4                  | 1.47                  | 0.17                  | 11.6  | 23 |                                     | M                                   | USA      | Turley et al. (1995) (5)       |
| 9    | NP  | 9         | 37.0      | 10.0 | 139    | 7.0  | 19.0                 | 3.7                  | 1.56                  | 0.35                  | 22.4  |    | African-American                    | M                                   | USA      | McMurray et al. (2002) (2)     |
| 9    | NP  | 9         | 35.0      | 8.6  | 137    | 6.0  | 18.5                 | 3.5                  | 1.53                  | 0.27                  | 17.6  |    | Caucasian                           | M                                   | USA      | McMurray et al. (2002) (2)     |
| 9.1  | 0.7 | 7-9       | 29.5      | 4.3  | 134    | 6.3  | 16.2                 | 1.50                 | 1.49                  | 0.20                  | 13.4  | 12 | Cycle ergometer v. treadmill study  | M                                   | USA      | Turley & Wilmore (1997) (6)    |
| 9.3  | 1.5 | 7-12      | 32.0      | 3.0  | 139    | 7.0  | NP                   | NP                   | 1.48                  | 0.24                  | 16.2  | 30 | BSA: 1.0-1.19 m <sup>3</sup>        | M                                   | USA      | Washington et al. (1988) (1)   |
| 9.3  | 1.3 | NP        | 36.1      | 9.1  | 136    | 8.9  | NP                   | NP                   | 1.40                  | 0.30                  | 21.4  | 12 | No VO <sub>2max</sub> plateau       | M                                   | PR       | Rivera-Brown et al. (2001) (4) |
| 9.4  | 1.7 | 7-12      | 33.2      | 7.3  | 139    | 10.3 | NP                   | NP                   | 1.40                  | 0.25                  | 17.9  | 32 |                                     | P                                   | USA      | Gilliam et al. (1977) (7)      |
| 9.8  | 0.6 | 8.2-11.0  | 34.3      | 7.8  | 140    | 5.5  | 17.5                 | 3.7                  | 1.20                  | 0.20                  | 16.7  | 20 | VO <sub>2max</sub> range: 0.6-1.4   | M                                   | USA      | Swain et al. (2010) (8)        |
| 9.8  | 1.6 | 8-12      | 38.0      | 2.1  | 143    | 7.6  | NP                   | NP                   | 1.79                  | 0.21                  | 11.7  | 12 | A priori average VO <sub>2max</sub> | P                                   | USA      | Robertson et al. (2001) (9)    |
| 10   | NP  | 10        | 39.3      | 9.0  | 142    | 7.0  | 19.3                 | 3.2                  | 1.69                  | 0.29                  | 17.2  |    | African-American                    | M                                   | USA      | McMurray et al. (2002) (2)     |

|      |     |                   |      |      |     |      |      |     |      |      |      |     |                                           |   |     |                                   |
|------|-----|-------------------|------|------|-----|------|------|-----|------|------|------|-----|-------------------------------------------|---|-----|-----------------------------------|
| 10   | NP  | 10                | 38.2 | 9.6  | 141 | 7.0  | 19.0 | 3.8 | 1.65 | 0.34 | 20.6 |     | Caucasian                                 | M | USA | McMurray et al. (2002) (2)        |
| 10.0 | 1.7 | 8-12              | 37.3 | 1.7  | 143 | 9.9  | NP   | NP  | 2.10 | 0.17 | 8.1  | 12  | A priori above average VO <sub>2max</sub> | P | USA | Robertson et al. (2001) (9)       |
| 10.5 | 1.0 | NP                | 39.9 | 8.0  | 143 | 6.8  | NP   | NP  | 1.78 | 0.25 | 14.0 | 11  |                                           | P | USA | Mahon et al. (2003) (10)          |
| 10.5 | 1.3 | NP                | 37.3 | 7.3  | NP  | NP   | NP   | NP  | 1.58 | 0.10 | 6.3  | 18  |                                           | M | USA | Rowland et al. (1993) (11)        |
| 10.6 | 1   | NP                | 38.0 | 10.0 | 143 | 7.0  | 18.0 | 3.0 | 1.86 | 0.30 | 16.1 | 61  | Year 1 of a longitudinal study            | P | USA | Janz et al. (1998) (12)           |
| 10.6 | 0.2 | NP                | 36.4 | 1.8  | 144 | 20.0 | NP   | NP  | 1.80 | 0.09 | 5.0  | 10  |                                           | M | USA | Del Corral et al. (1994) (13)     |
| 10.8 | 1.0 | NP                | 39.0 | 11.0 | 144 | 7.0  | NP   | NP  | 1.86 | 0.30 | 16.1 | 63  |                                           | M | USA | Janz et al. (2000) (14)           |
| 10.9 | 1.3 | NP                | 37.6 | 3.4  | 145 | 5.0  | NP   | NP  | 1.90 | 0.34 | 17.9 | 15  |                                           | P | USA | Rowland (1997) (15)               |
| 10.9 | 1.1 | Total sample only | 36.5 | 8.6  | 143 | 7.4  | NP   | NP  | 1.48 | 0.22 | 14.9 | 5   | ADHD patients                             | P | USA | Mahon et al. (2008) (16)          |
| 10.9 | 1.1 | Total sample only | 36.5 | 8.6  | 143 | 7.4  | NP   | NP  | 1.62 | 0.26 | 16.0 | 9   | ADHD patients                             | P | USA | Mahon et al. (2008) (16)          |
| 11   | NP  | 11                | 46.2 | 12.4 | 149 | 9.0  | 20.5 | 4.0 | 1.99 | 0.51 | 25.6 |     | African-American                          | M | USA | McMurray et al. (2002) (2)        |
| 11   | NP  | 11                | 44.1 | 12.6 | 147 | 7.0  | 20.2 | 4.4 | 1.77 | 0.36 | 20.3 |     | Caucasian                                 | M | USA | McMurray et al. (2002) (2)        |
| 7.4  | 0.3 | 7                 | 26.3 | 4.4  | 126 | 5.1  | NP   | NP  | 1.23 | 0.28 | 22.8 | 18  | Test of a field procedure                 | M | Fra | Van Praagh et al. (1988) (17)     |
| 7.7  | 0.3 |                   | 27.4 | 3.4  | 130 | 4.4  | NP   | NP  | 1.51 | 0.20 | 13.2 | 18  |                                           | M | Fin | Tompuri et al. (2015) (18)        |
| 8.7  | NP  | 8.3-9.8           | 27.6 | 3.6  | 132 | 6.1  | NP   | NP  | 1.46 | 0.19 | 13.0 | 20  |                                           | M | Swe | Sunnegardh & Bratteby (1987) (19) |
| 9    | NP  | 9                 | 34.0 | 6.5  | 140 | 6.3  | 17.3 | 2.5 | 1.60 | 0.20 | 12.5 | 602 | Population-based sample                   | P | Nor | Kolle et al. (2010) (20)          |
| 9    | NP  | 8-10              | 26.2 | 2.8  | 130 | 4.4  | NP   | NP  | 1.31 | 0.17 | 13.0 | 19  | Used IBP Handbook (1969)                  | M | Jap | Ikai & Kitagawa (1972) (21)       |
| 9.4  | 0.3 | 9-14              | 31.0 | 4.5  | 137 | 4.8  | NP   | NP  | 1.59 | 0.24 | 15.1 | 29  | Longitudinal study; 2nd year              | M | Nor | Andersen et al. (1976) (22)       |
| 9.5  | 0.3 | 9                 | 33.4 | 6.2  | 139 | 6.0  | 17.2 | 2.4 | 1.38 | 0.20 | 14.5 | 269 | European Youth Heart Study                | M | Eur | Ortega et al. (2010) (23)         |
| 9.5  | 0.5 | NP                | 35.3 | 7.4  | 142 | 6.0  | NP   | NP  | 1.80 | 0.30 | 16.7 | 177 | 20% overweight or obese                   | P | Fin | Agbaje et al. (2019) (24)         |
| 9.9  | 0.4 | NP                | 32.2 | 3.4  | 141 | 4.6  | NP   | NP  | 1.49 | 0.21 | 14.1 | 28  |                                           | M | Nor | Andersen & Ghesquiere (1972) (25) |
| 9.9  | 0.3 | 9-10              | 32.9 | 5.0  | 138 | 6.0  | 17.1 | 1.9 | 1.45 | 0.25 | 17.2 | 53  |                                           | P | UK  | Farr et al. (2019) (26)           |
| 9.9  | NP  | 9.5-10.1          | 35.6 | NP   | 142 | 11.2 | NP   | NP  | 1.83 | 0.51 | 27.9 | 71  | Part of the PANIC study                   | P | Fin | Lintu et al. (2015) (27)          |

|      |     |       |      |     |     |     |      |     |      |      |      |    |                                        |   |     |                                    |
|------|-----|-------|------|-----|-----|-----|------|-----|------|------|------|----|----------------------------------------|---|-----|------------------------------------|
| 9.9  | 0.3 | NP    | 32.0 | 4.0 | 138 | 5.0 | NP   | NP  | 1.51 | 0.23 | 15.2 | 31 |                                        | P | UK  | McNarry et al. (2015) (28)         |
| 10   | NP  | 10    | 33.3 | 6.6 | 139 | 7.4 | NP   | NP  | 1.84 | 0.31 | 16.8 | 20 |                                        | M | Can | Massicotte et al. (1985) (29)      |
| 10   | NP  | 10    | NP   | NP  | NP  | NP  | NP   | NP  | 1.72 | 0.27 | 15.7 | 26 |                                        | M | Slo | Dzurenkova et al. (2001) (30)      |
| 10   | NP  | 10    | NP   | NP  | NP  | NP  | NP   | NP  | 1.30 | 0.20 | 15.4 | 15 | Rural boys                             | M | Jap | Yoshizawa (1972) (31)              |
| 10.3 | 0.8 | 9-12  | 31.5 | 3.1 | 140 | 5.5 | 16.0 | 1.1 | 1.26 | 0.18 | 14.3 | 20 | One obese parent                       | P | Isr | Weinstein et al. (2004) (32)       |
| 10.3 | 0.8 | 9-12  | 32.9 | 5.4 | 141 | 6.2 | 16.2 | 1.3 | 1.25 | 0.18 | 14.4 | 20 | Normal-weight parents                  | P | Isr | Weinstein et al. (2004) (32)       |
| 10.3 | 2.4 | NP    | 34.3 | 2.2 | 142 | 6.2 | 16.9 | 1.4 | 1.50 | 0.50 | 33.3 | 23 | Normal-weight boys                     | P | Can | Peralta-Huertas et al. (2008) (33) |
| 10.4 | NP  | 10    | 33.9 | 5.0 | 141 | 5.0 | NP   | NP  | 2.03 | 0.30 | 14.8 | 31 | Year 3 of a longitudinal study         | M | Nor | Rutenfranz et al. (1981) (34)      |
| 10.5 | 2.6 | NP    | 51.0 | 9.0 | 146 | 5.2 | 24.0 | 3.4 | 1.80 | 0.37 | 20.6 | 23 | Overweight boys                        | P | Can | Peralta-Huertas et al. (2008) (33) |
| 10.5 | 0.4 | NP    | 36.3 | 7.2 | 140 | 4.0 | NP   | NP  | 1.59 | 0.20 | 12.6 | 15 | Control group                          | P | H-K | McManus (2005) (35)                |
| 10.5 | NP  | 10    | 36.0 | NP  | NP  | NP  | NP   | NP  | 1.59 | NP   |      | 20 | VO <sub>2max</sub> range=1.3-2.0 L/min | M | Nor | Hermansen & Oseid (1971) (36)      |
| 10.5 | 0.5 | 10-11 | 37.2 | 6.6 | 141 | 4.7 | NP   | NP  | 1.60 | 0.20 | 12.5 | 50 | Control group                          | M | Fra | Mandigout et al. (2001) (37)       |
| 10.6 | 0.3 | NP    | 37.9 | 5.4 | 144 | 4.6 | NP   | NP  | 1.80 | 0.28 | 15.6 | 17 |                                        | M | Fra | Vinet et al. (2003) (38)           |
| 10.6 | NP  | NP    | NP   | NP  | NP  | NP  | NP   | NP  | 1.66 | 0.14 | 8.4  | 20 | Asthmatics (various severity)          | M | Swe | Friberg et al. (1989) (39)         |
| 10.6 | 0.3 | NP    | 36.3 | 6.2 | 143 | 7.0 | NP   | NP  | 1.71 | 0.24 | 14.0 | 25 |                                        | P | UK  | Fawknner & Armstrong (2004) (40)   |
| 10.7 | 0.4 | 10-11 | 37.3 | 7.5 | 143 | 6.1 | NP   | NP  | 1.70 | 0.30 | 17.6 | 35 | Training group (pre)                   | M | Fra | Mandigout et al. (2001) (37)       |
| 10.7 | 0.8 | NP    | 30.5 | 4.2 | 132 | 5.8 | 17.6 | 2.2 | 1.30 | 0.10 | 7.7  | 30 | Low altitude, low SES                  | M | Bol | de Jonge et al. (1996) (41)        |
| 10.8 | 0.4 | NP    | 34.9 | 5.2 | 146 | 6.0 | NP   | NP  | 1.84 | 0.24 | 13.0 | 45 |                                        | M | Aut | Gaisl & Buchberger (1980) (42)     |
| 10.8 | NP  | 9-10  | 35.2 | 5.9 | 142 | 6.7 | NP   | NP  | 1.72 | 0.38 | 22.1 | 62 |                                        | M | Can | Cunningham et al. (1984) (43)      |
| 10.8 | 0.5 | NP    | 37.6 | 7.4 | 148 | 7.3 | NP   | NP  | 2.00 | 0.20 | 10.0 | 18 |                                        | M | Can | Docherty & Gaul (1991) (44)        |
| 11   | NP  | 10-11 | 30.8 | 4.1 | 135 | 4.2 | NP   | NP  | 1.50 | 0.26 | 17.3 | 18 |                                        | M | Jap | Ikai & Kitagawa (1972) (21)        |
| 8.4  | NP  | 8     | 27.4 | 3.9 | 131 | 4.5 | NP   | NP  | 1.44 | 0.19 | 13.2 | 28 | Year 1 of a longitudinal study         | M | Nor | Rutenfranz et al. (1981) (34)      |
| 8.4  | NP  | NP    | 27.4 | 3.9 | 131 | 4.5 | NP   | NP  | 1.44 | 0.19 | 13.2 | 29 | Part of a longitudinal study           | M | Nor | Andersen et al. (1974) (45)        |
| 9.9  | 0.3 | 9-10  | 32.9 | 5.0 | 1.4 | 0.1 | 17.1 | 1.9 | 1.5  | 0.3  |      | 53 | healthy boys                           | P | GB  | Farr 2019 (26)                     |

|      |     |      |      |      |     |      |      |     |      |      |      |              |                                           |     |              |                                |
|------|-----|------|------|------|-----|------|------|-----|------|------|------|--------------|-------------------------------------------|-----|--------------|--------------------------------|
| 10.8 | 1.7 | NP   | 37.4 | 12.0 | 144 | 11.8 | 17.5 | 3   | 1.89 | 0.47 | 18   | healthy boys | P                                         | USA | Lu 2019 (46) |                                |
| 7.2  | 0.6 | NP   | 24.4 | 3.0  | 123 | 5.8  | NP   | NP  | 1.19 | 0.25 | 21.0 | 8            |                                           | M   | UK           | Davies et al. (1972) (47)      |
| 8    | NP  | 8    | NP   | NP   | NP  | NP   | NP   | NP  | 1.28 | 0.61 | 47.7 | 2            |                                           | M   | Slo          | Dzurenkova et al. (2001) (30)  |
| 8    | NP  | 7-9  | 27.2 | 3.3  | 131 | 5.9  | NP   | NP  | 1.31 | 0.19 | 14.5 | 12           | Inactive; no warmup before testing        | M   | Isr          | Inbar & Bar-Or (1975) (48)     |
| 8.7  | 1.0 | NP   | 31.6 | 5.7  | 135 | 6.0  | NP   | NP  | 1.48 | 0.23 | 15.5 | 7            |                                           | P   | Ger          | Dunstheimer et al. (2001) (49) |
| 9    | NP  | 9    | NP   | NP   | NP  | NP   | NP   | NP  | 1.12 | 0.20 | 17.9 | 8            | Rural boys                                | M   | Jap          | Yoshizawa (1972) (31)          |
| 9    | NP  | 9    | NP   | NP   | NP  | NP   | NP   | NP  | 1.56 | 0.28 | 17.9 | 8            |                                           | M   | Slo          | Dzurenkova et al. (2001) (30)  |
| 9.5  | 0.2 | 9    | 34.7 | 6.2  | 141 | 6.3  | 17.4 | 2.5 | 1.73 | 0.28 | 16.2 | 10           | Test of new VO <sub>2peak</sub> equation  | P   | Ice          | Arngrímsson et al. (2008) (50) |
| 9.9  | 1.6 | 8-12 | 52.9 | 13.9 | 141 | 11.0 | 26.1 | 3.5 | 1.69 | 0.26 | 15.4 | 7            | Obese subjects; pre-exercise program      | M   | Ita          | Lazzer et al. (2008) (51)      |
| 10   | NP  | 10   | 28.6 | 4.7  | 135 | 12.3 | NP   | NP  | 1.59 | 0.23 | 14.5 | 4            | Twin study; trained (pre)                 | M   | Can          | Weber et al. (1976) (52)       |
| 10   | NP  | 10   | 28.6 | 4.2  | 135 | 11.7 | NP   | NP  | 1.59 | 0.13 | 8.2  | 4            | Twin study; untrained (pre)               | M   | Can          | Weber et al. (1976) (52)       |
| 10   | NP  | 10   | NP   | NP   | NP  | NP   | NP   | NP  | 1.38 | 0.20 | 14.5 | 5            | Urban boys                                | M   | Jap          | Yoshizawa (1972) (31)          |
| 10   | NP  | 10   | 28.6 | 4.7  | 135 | 12.3 | NP   | NP  | 1.58 | 0.23 | 14.6 | 4            | Twin Study: Trained pre-study             | M   | Can          | Weber et al. (1976) (52)       |
| 10   | NP  | 10   | 28.6 | 4.2  | 135 | 11.7 | NP   | NP  | 1.59 | 0.13 | 8.2  | 4            | Twin Study: Untrained pre-study           | M   | Can          | Weber et al. (1976) (52)       |
| 10.1 | 0.5 | NP   | 31.7 | 2.7  | 139 | 4.0  | NP   | NP  | 1.41 | 0.18 | 12.8 | 9            | Sample by equal LBM                       | P   | UK           | Winsley et al. (2009) (53)     |
| 10.1 | 1.8 | NP   | 31.6 | 5.4  | 142 | 8.3  | 15.5 | 0.9 | 1.70 | 0.50 | 29.4 | 9            | Normal weight group                       | P   | Aus          | Crisp et al. (2012) (54)       |
| 10.2 | 0.4 | 9-11 | 32.4 | 3.5  | 142 | 5.1  | NP   | NP  | 1.82 | 0.22 | 12.1 | 10           | Second experiment                         | P   | Den          | Hansen et al. (1989) (55)      |
| 10.2 | NP  | 10   | 28.7 | 3.0  | 132 | 2.2  | NP   | NP  | 1.10 | 0.17 | 15.5 | 8            |                                           | M   | Jap          | Yamaji & Miyashita (1977) (56) |
| 10.3 | 0.5 | NP   | 32.2 | 5.4  | 142 | 9.5  | NP   | NP  | 1.62 | NP   |      | 10           | Controls for a training experiment (pre)  | P   | UK           | Tolfrey et al. (1998) (57)     |
| 10.3 | 0.2 | 8-12 | NP   | NP   | NP  | NP   | NP   | NP  | 1.79 | 0.10 | 5.6  | 16           | Trained: test of exercise-induced hypoxia | M   | Fra          | Nourry et al. (2004) (58)      |

|      |     |       |      |      |     |     |      |     |      |      |      |    |                                          |   |     |                                       |
|------|-----|-------|------|------|-----|-----|------|-----|------|------|------|----|------------------------------------------|---|-----|---------------------------------------|
| 10.3 | 0.1 | 10-11 | 38.9 | 5.6  | 145 | 4.0 | NP   | NP  | 1.38 | 0.17 | 12.3 | 10 | Interval training group (pre-training)   | P | H-K | McManus (2005) (35)                   |
| 10.3 | 0.1 | NP    | 32.4 | 3.5  | 142 | 5.1 | NP   | NP  | 1.82 | 0.22 | 12.1 | 10 | Second experiment                        | P | Den | Hansen et al. (1989) (55)             |
| 10.3 | NP  | NP    | 33.2 | 5.7  | 143 | 7.8 | NP   | NP  | 1.61 | 0.19 | 11.8 | 14 |                                          | P | Den | Andersen et al. (1974) (45)           |
| 10.4 | 0.4 | NP    | 35.9 | 7.3  | 140 | 4.0 | NP   | NP  | 1.65 | 0.16 | 9.7  | 10 | Continuous training group (pre-training) | P | H-K | McManus (2005) (35)                   |
| 10.5 | 0.3 | 10-11 | 36.3 | 7.9  | 144 | 7.1 | NP   | NP  | 1.64 | 0.20 | 12.2 | 9  | First experiment                         | M | Den | Hansen et al. (1989) (55)             |
| 10.6 | 0.9 | NP    | 34.7 | 6.9  | 143 | 7.1 | NP   | NP  | 1.60 | NP   |      | 12 | Training group (pre-experiment)          | P | UK  | Tolfrey et al. (1998) (57)            |
| 10.7 | 0.3 | 10-11 | 35.8 | 5.7  | 143 | 6.0 | NP   | NP  | 1.61 | 0.23 | 14.3 | 9  |                                          | P | UK  | Welsman et al. (2005) (59)            |
| 10.7 | 0.9 | NP    | 35.7 | 6.6  | 147 | 8.4 | NP   | NP  | 1.70 | 0.28 | 16.5 | 9  |                                          | P | Bel | Vandekerckhove et al. (2016) (60)     |
| 10.7 | NP  | NP    | 47.9 | 13.8 | 148 | 9.1 | 21.7 | 4.7 | 1.70 | 0.50 | 29.4 | 9  | Overweight group                         | P | Aus | Crisp et al. (2012) (61)              |
| 10.7 | 2.1 | 7-10  | 42.0 | 15.0 | 147 | 8.0 | NP   | NP  | 2.28 | 0.13 | 5.7  | 12 | Undergoing leukemia treatment            | P | Pol | Kowaluk & Wojniewski (2020) (62)      |
| 10.8 | 0.7 | NP    | 35.3 | 11.0 | 140 | 9.4 | NP   | NP  | 1.63 | 0.39 | 23.9 | 9  |                                          | M | UK  | Davies et al. (1972) (47)             |
| 11   | NP  | 10-11 | 33.4 | 7.2  | 143 | 8.4 | 16.3 | 2.3 | 2.00 | 0.20 | 10.0 | 12 | Normal hearing boys                      | M | Pol | Zebrowska & Zwierzchowska (2009) (63) |
| 8.4  | NP  | 7-9   | 27.2 | 3.3  | 131 | 5.9 | NP   | NP  | 1.38 | 0.20 | 14.5 | 12 | Non-active in sports                     | M | Isr | Inbar & Bar-Or (1975) (48)            |

(Y=years, VO<sub>2max</sub>=maximal oxygen consumption, NP=not provided, BSA=body surface area, LBM=lean body mass, Fra=France, Fin=Finland, Swe=Sweden, Nor=Norway, Jap=Japan, Eur=Europe, Can=Canada, Slo=Slovenia, Isr=Israel, PR=Puerto Rico, H-K=Hong Kong, Bol=Bolivia, Aut=Austria, Ice=Iceland, Ita=Italy, Aus=Australia, Den=Denmark, Bel=Belgium)

## References

1. Washington RL, van Gundy JC, Cohen C, Sondheimer HM, Wolfe RR. Normal aerobic and anaerobic exercise data for North American school-age children. *J Pediatr.* 1988;112(2):223–33.
2. McMurray RG, Harrell JS, Bradley C, Deng S, Bangdiwala SI. Predicted maximal aerobic power inouth is related to gender, ethnicity, and

body composition. *Med Sci Sport Exerc.* 2001;33(5):S31.

3. Sockolov R, Irwin B, Dressendorfer RH, Bernauer EM. Exercise performance in 6 to 11 year old boys with Duchenne muscular dystrophy. *Arch Phys Med Rehabil.* 1977;58(5):195–201.
4. Rivera-Brown AM, Alvarez M, Rodríguez-Santana JR, Benetti PJ. Anaerobic power and achievement of  $\dot{V}O_2$  plateau in pre-pubertal boys. *Int J Sports Med.* 2001;22(2):111–5.
5. Turley KR, Rogers DM, Harper KM, Kujawa KI, Wilmore JH. Maximal Treadmill versus Cycle Ergometry Testing in Children: Differences, Reliability, and Variability of Responses. *Pediatr Exerc Sci.* 1995;7(1):49–60.
6. Turley KR, Wilmore JH. Cardiovascular responses to submaximal exercise in 7- to 9-yr-old boys and girls. *Med Sci Sports Exerc.* 1997;29(6):824–32.
7. Gilliam TB, Katch VL, Thorland W, Weltman A. Prevalence of coronary heart disease risk factors in active children, 7 to 12 years of age. *Med Sci Sports Exerc.* 1977;9(1):21–5.
8. Swain KE, Rosenkranz SK, Beckman B, Harms CA. Expiratory flow limitation during exercise in prepubescent boys and girls: prevalence and implications. *J Appl Physiol.* 2010;108(5):1267–74.
9. Robertson RJ, Goss FL, Boer N, et al. OMNI scale perceived exertion at ventilatory breakpoint in children: Response normalized. *Med Sci*

*Sports Exerc.* 2001;33(11):1946–52.

10. Mahon AD, Anderson CS, Hipp MJ, Hunt KA. Heart Rate Recovery from Submaximal Exercise in Boys and Girls. *Med Sci Sports Exerc.* 2003;35(12):2093–7.
11. Rowland TW, Rambusch JM, Staab JS, Unnithan VB, Siconolfi SF. Accuracy of physical working capacity (PWC170) in estimating aerobic fitness in children. *J Sports Med Phys Fitness.* 1993;33(2):184–8.
12. Janz KF, Burns TL, Witt JD, Mahoney LT. Longitudinal analysis of scaling  $\dot{V}O_2$  for differences in body size during puberty: The muscatine study. *Med Sci Sports Exerc.* 1998;30(9):1436–44.
13. Del Corral P, Mahon AD, Duncan GE, Howe CA, Craig BW. The effect of exercise on serum and salivary cortisol in male children. *Med Sci Sports Exerc.* 1994;26(11):1297–301.
14. Janz KF, Dawson JD, Mahoney LT. Tracking physical fitness and physical activity from childhood to adolescence: The Muscatine study. *Med Sci Sports Exerc.* 2000;32(7):1250–7.
15. Rowland TW. *The development of aerobic fitness in children.* London: E & FN Spon.; 1997. 179–189 p.
16. Mahon AD, Stephens BR, Cole AS. Exercise responses in boys with attention deficit/hyperactivity disorder: Effects of stimulant medication. *J Atten Disord.* 2008;12(2):170–6.

17. Van Praagh E, Bedu M, Falgairette G, Fellmann N, Coudert J. Comparaison entre over VO2 max direct et indirect chez l'enfant de 7 et 12 ans. Validation d'une épreuve de terrain. *Sci Sport*. 1988;3(4):327–32.
18. Tompuri T, Lintu N, Savonen K, et al. Measures of cardiorespiratory fitness in relation to measures of body size and composition among children. *Clin Physiol Funct Imaging*. 2015;35(6):469–77.
19. Sunnegårdh J, Bratteby LE. Maximal oxygen uptake, anthropometry and physical activity in a randomly selected sample of 8 and 13 year old children in Sweden. *Eur J Appl Physiol Occup Physiol*. 1987;56(3):266–72.
20. Kolle E, Steene-Johannessen J, Andersen LB, Anderssen SA. Objectively assessed physical activity and aerobic fitness in a population-based sample of Norwegian 9- and 15-year-olds. *Scand J Med Sci Sport* [Internet]. 2010 [cited 2022 Jun 30];20(1) Available from: <https://pubmed.ncbi.nlm.nih.gov/19422647/>. doi:10.1111/j.1600-0838.2009.00892.x.
21. Ikai M, Kitagawa K. Maximum oxygen uptake of Japanese related to sex and age. *Med Sci Sports Exerc*. 1972;4(3):127–31.
22. Lange Andersen K, Seliger V, Rutenfranz J, Skrobak-Kaczynski J. Physical performance capacity of children in Norway - Part IV. The rate of growth in maximal aerobic power and the influence of improved physical education of children in a rural community - population parameters in a rural community. *Eur J Appl Physiol Occup Physiol*. 1976;35(1):49–58.
23. Ortega FB, Ruiz JR, Hurtig-Wennlöf A, et al. Cardiovascular fitness modifies the associations between physical activity and abdominal adiposity in children and adolescents: The European youth heart study. *Br J Sports Med*. 2010;44(4):256–62.



24. Agbaje AO, Haapala EA, Lintu N, et al. Peak oxygen uptake cut-points to identify children at increased cardiometabolic risk – The PANIC Study. *Scand J Med Sci Sport*. 2019;29(1):16–24.
25. Andersen KL, Ghesquiere J. Sex differences in maximal oxygen uptake, heart rate and oxygen pulse at 10 and 14 years in Norwegian children. *Hum Biol*. 1972;44(3):413–31.
26. Farr C, Middlebrooke AR, Armstrong N, et al. Objectively measured aerobic fitness is not related to vascular health outcomes and cardiovascular disease risk in 9-10 year old children. *J Sport Sci Med*. 2019;18(3):513–22.
27. Lintu N, Viitasalo A, Tompuri T, et al. Cardiorespiratory fitness, respiratory function and hemodynamic responses to maximal cycle ergometer exercise test in girls and boys aged 9–11 years: the PANIC Study. *Eur J Appl Physiol*. 2015;115(2):235–43.
28. McNarry MA, Farr C, Middlebrooke A, et al. Aerobic Function and Muscle Deoxygenation Dynamics during Ramp Exercise in Children. *Med Sci Sports Exerc*. 2015;47(9):1877–84.
29. Massicotte DR, Gauthier R, Markon P. Prediction of VO<sub>2</sub>max from the running performance in children aged 10-17 years. *J Sports Med Phys Fitness*. 1985;25(1–2):10–7.
30. Dzurenkova D, Marcek T, Hajkova M. Specialities of assessment of endurance capabilities in sport active children. *Bratisl Lek Listy*. 2001;102(9):432–3.

31. Yoshizawa S. A comparative study of aerobic work capacity in urban and rural adolescents. *J Hum Ergol (Tokyo)*. 1972;1(1):45–65.
32. Weinstein Y, Kamerman T, Berry E, Falk B. Mechanical Efficiency of Normal-Weight Prepubertal Boys Predisposed to Obesity. *Med Sci Sports Exerc*. 2004;36(4):567–73.
33. Peralta-Huertas J, Livingstone K, Banach A, Klentrou P, O’Leary D. Differences in left ventricular mass between overweight and normal-weight preadolescent children. *Appl Physiol Nutr Metab*. 2008;33(6):1172–80.
34. Rutenfranz J, Andersen KL, Seliger V, Klimmer F, Berndt I, Ruppel M. Maximum aerobic power and body composition during the puberty growth period: Similarities and differences between children of two European countries. *Eur J Pediatr*. 1981;136(2):123–33.
35. McManus AM, Cheng CH, Leung MP, Yung TC, Macfarlane DJ. Improving aerobic power in primary school boys: A comparison of continuous and interval training. *Int J Sports Med*. 2005;26(9):781–6.
36. Hermansen L, Oseid S. Direct and indirect estimation of maximal oxygen uptake in pre-pubertal boys. *Acta Paediatr Scand Suppl*. 1971;217:18–23.
37. S M, AM L, D C, P G, P O. Effect of gender in response to an aerobic training programme in prepubertal children. *Acta Paediatr*. 2001;90(1):9–15.
38. Vinet A, Mandigout S, Nottin S, et al. Influence of Body Composition, Hemoglobin Concentration, and Cardiac Size and Function of

Gender Differences in Maximal Oxygen Uptake in Prepubertal Children. *Chest*. 2003;124(4):1494–9.

39. Friberg S, Bevegård S, Graff-Lonnevig V, Hallbäck I. Asthma from childhood to adulthood-A follow-up study of 20 subjects with special reference to work capacity and pulmonary gas exchange. *J Allergy Clin Immunol*. 1989;84(2):183–90.
40. Fawcner SG, Armstrong N. Sex differences in the oxygen uptake kinetic response to heavy-intensity exercise in prepubertal children. *Eur J Appl Physiol*. 2004;93(1–2):210–6.
41. De Jonge R. Effect of anthropometric characteristics and socio-economic status on physical performances of pre-pubertal children living in Bolivia at low altitude. *Eur J Appl Physiol Occup Physiol*. 1996;74(4):367–74.
42. Gaisl G, Buchberger J. *Determination of the aerobic and anaerobic thresholds of 10-11-year-old boys using blood-gas analysis*. Baltimore: University Park Press; 1980. 93–98 p.
43. Cunningham DA, Paterson DH, Blimkie CJR, Donner AP. Development of cardiorespiratory function in circumpubertal boys: A longitudinal study. *J Appl Physiol Respir Environ Exerc Physiol*. 1984;56(2):302–7.
44. Docherty D, Gaul CA. Relationship of body size, physique, and composition to physical performance in young boys and girls. *Int J Sports Med*. 1991;12(6):525–32.
45. Lange Andersen K, Seliger V, Rutenfranz J, Mocellin R. Physical performance capacity of children in Norway - Part I. Population

parameters in a rural inland community with regard to maximal aerobic power. *Eur J Appl Physiol Occup Physiol*. 1974;33(3):177–95.

46. Lu KD, Bar-Yoseph R, Radom-Aizik S, Cooper DM. A new approach to estimate aerobic fitness using the NHANES dataset. *Scand J Med Sci Sport*. 2019;29(9):1392–401.
47. Davies CT, Barnes C, Godfrey S. Body composition and maximal exercise performance in children. *Hum Biol*. 1972;44(2):195–214.
48. Inbar O, Bar-Or O. The effects of intermittent warm-up on 7-9-year-old boys. *Eur J Appl Physiol Occup Physiol*. 1975;34(1):81–9.
49. Dunstheimer D, Hebestreit H, Staschen B, Starßburg HM, Jeschke R. Bilateral deficit during short-term, high-intensity cycle ergometry in girls and boys. *Eur J Appl Physiol*. 2001;84(6):557–61.
50. Arngrímsson SÁ, Sveinsson T, Jóhannsson E. Peak oxygen uptake in children: Evaluation of an older prediction method and development of a new one. *Pediatr Exerc Sci*. 2008;20(1):62–73.
51. Lazzer S, Molin M, Stramare D, Facchini S, Francescato MP. Effects of an eight-month weight-control program on body composition and lipid oxidation rate during exercise in obese children. *J Endocrinol Invest*. 2008;31(6):509–14.
52. Weber G, Kartodihardjo W, Klissouras V. Growth and physical training with reference to heredity. *J Appl Physiol*. 1976;40(2):211–5.
53. Winsley RJ, Fulford J, Roberts AC, Welsman JR, Armstrong N. Sex difference in peak oxygen uptake in prepubertal children. *J Sci Med Sport*. 2009;12(6):647–51.

54. Crisp NA, Fournier PA, Licari MK, Braham R, Guelfi KJ. Adding sprints to continuous exercise at the intensity that maximises fat oxidation: Implications for acute energy balance and enjoyment. *Metabolism*. 2012;61(9):1280–8.
55. Hansen HS, Froberg K, Nielsen JR, Hyldebrandt N. A new approach to assessing maximal aerobic power in children: the Odense School Child Study. *Eur J Appl Physiol Occup Physiol*. 1989;58(6):618–24.
56. Yamaji K, Miyashita M. Oxygen transport system during exhaustive exercise in Japanese boys. *Eur J Appl Physiol Occup Physiol*. 1977;36(2):93–9.
57. Tolfrey K, Campbell IG, Batterham AM. Aerobic trainability of prepubertal boys and girls. *Pediatr Exerc Sci*. 1998;10(3):248–63.
58. Nourry C, Fabre C, Bart F, Grosbois JM, Berthoin S, Mucci P. Evidence of Exercise-Induced Arterial Hypoxemia in Prepubescent Trained Children. *Pediatr Res*. 2004;55(4):674–81.
59. Welsh L, Roberts RGD, Kemp JG. Fitness and physical activity in children with asthma. *Sport Med*. 2004;34(13):861–70. [cited 2022 Jun 28 ] Available from: <https://pubmed.ncbi.nlm.nih.gov/15487902/>.
60. Vandekerckhove K, Coomans I, Moerman A, De Wolf D, Boone J. Characterizing cerebral and locomotor muscle oxygenation to incremental ramp exercise in healthy children: relationship with pulmonary gas exchange. *Eur J Appl Physiol*. 2016;116(11–12):2345–55.
61. Crisp NA, Guelfi KJ, Licari MK, Braham R, Fournier PA. Does exercise duration affect Fat max in overweight boys? *Eur J Appl Physiol*.

2012;112(7):2557–64.

62. Kowaluk A, Woźniewski M. Peak oxygen uptake and exercise capacity of children undergoing leukemia treatment. *Int J Environ Res Public Health*. 2020;17(23):1–18.
63. Zebrowska A, Zwierzchowska A. Spirometric values and aerobic efficiency of children and adolescents with hearing loss. *J Physiol Pharmacol*. 2006;57(SUPPL. 4):443–7.
